# Supplementary material for: The role of continental lithospheric thermal structure in the evolution of orogenic systems: application to the Himalayan–Tibetan collision zone
Source: Copernicus journal article supplement (doi:10.5194/se-14-1155-2023), 2023-11-01
Supplement: Supplementary file 1 [file se-14-1155-2023-supplement.pdf]

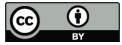

*Supplement of*

**The role of continental lithospheric thermal structure in the evolution of orogenic systems: application to the Himalayan–Tibetan collision zone**

**Mengxue Liu et al.**

*Correspondence to:* Dinghui Yang ([ydh@mail.tsinghua.edu.cn](mailto:ydh@mail.tsinghua.edu.cn))

The copyright of individual parts of the supplement might differ from the article licence.

Table S1. Parameter list of the numerical experiments

| Material                  | Units                          | Sub-lithospheric       | Continental          | Continental          | Lithospheric           |                      |                      |                      |
|---------------------------|--------------------------------|------------------------|----------------------|----------------------|------------------------|----------------------|----------------------|----------------------|
| Parameters                |                                | Mantle                 | upper                | lower                | Mantle                 | Oceanic              | Oceanic              | Weak                 |
|                           |                                |                        | Crust                | Crust                |                        | Sediment             | Crust                | Zone                 |
| Thickness                 | km                             | -                      | 25                   | 10                   | 85, 88                 | 4                    | 8                    | -                    |
| Thermal                   | $\text{m}^2 \text{s}^{-1}$     | $9.89 \cdot 10^{-7}$   | $1.21 \cdot 10^{-6}$ | $1.15 \cdot 10^{-6}$ | $9.87 \cdot 10^{-7}$   | $1.21 \cdot 10^{-6}$ | $1.21 \cdot 10^{-6}$ | $1.21 \cdot 10^{-6}$ |
| Diffusivities( $\kappa$ ) |                                |                        |                      |                      |                        |                      |                      |                      |
| Heat                      | J                              | 1250                   | 750                  | 750                  | 1250                   | 750                  | 750                  | 750                  |
| Capacity ( $C_p$ )        | $\text{kg}^{-1} \text{K}^{-1}$ |                        |                      |                      |                        |                      |                      |                      |
| Density( $\rho$ )         | $\text{kg m}^{-3}$             | 3370                   | 2800                 | 2900                 | 3370                   | 3000                 | 3000                 | 3300                 |
| Thermal                   |                                |                        |                      |                      |                        |                      |                      |                      |
| expansivity( $\alpha$ )   | $\text{K}^{-1}$                | $3 \cdot 10^{-5}$      | $2.7 \cdot 10^{-5}$  | $2.7 \cdot 10^{-5}$  | $3 \cdot 10^{-5}$      | $2.7 \cdot 10^{-5}$  | $2.7 \cdot 10^{-5}$  | $2.7 \cdot 10^{-5}$  |
| Angle of internal         | $^\circ$                       | 30                     | 30                   | 30                   | 30                     | 2                    | 2                    | 2                    |
| friction( $\phi$ )        |                                |                        |                      |                      |                        |                      |                      |                      |
| Cohesion (C)              | Pa                             | $20 \cdot 10^6$        | $20 \cdot 10^6$      | $20 \cdot 10^6$      | $20 \cdot 10^6$        | $10 \cdot 10^6$      | $10 \cdot 10^6$      | $10 \cdot 10^6$      |
| Flow Law <sup>a</sup>     | -                              | dry olivine(diff/disl) | wet quartzite        | wet anorthite        | dry olivine(diff/disl) | gabbro               | gabbro               | gabbro               |

|                                          |                                     |                                                |                        |                        |                                                |                                              |                           |                           |
|------------------------------------------|-------------------------------------|------------------------------------------------|------------------------|------------------------|------------------------------------------------|----------------------------------------------|---------------------------|---------------------------|
| Visc.prefactor<br>(A*) <sup>b</sup>      | Pa <sup>-n</sup><br>S <sup>-1</sup> | 2.37·10 <sup>-15</sup> /6.52·10 <sup>-16</sup> | 8.57·10 <sup>-28</sup> | 7.13·10 <sup>-18</sup> | 2.37·10 <sup>-15</sup> /6.52·10 <sup>-16</sup> | 1.0·10 <sup>50</sup> /1.12·10 <sup>-10</sup> | 1.0·10 <sup>50</sup> /1.1 | 1.0·10 <sup>50</sup> /1.1 |
| Stress exponent<br>(n)                   | -                                   | 1/3.5                                          | 1/4.0                  | 1/3                    | 1/3.5                                          | 1/3.4                                        | 1/3.4                     | 1/3.4                     |
| Activation<br>Energy (E)                 | J mol <sup>-1</sup>                 | 375·10 <sup>3</sup> /530·10 <sup>3</sup>       | 0/223·10 <sup>3</sup>  | 0/345·10 <sup>3</sup>  | 375·10 <sup>3</sup> /530·10 <sup>3</sup>       | 497·10 <sup>3</sup>                          | 497·10 <sup>3</sup>       | 497·10 <sup>3</sup>       |
| Activation<br>Volume (V)                 | m <sup>3</sup><br>mol <sup>-1</sup> | 4·10 <sup>-6</sup> /18·10 <sup>-6</sup>        | 0/0                    | 0/0                    | 4·10 <sup>-6</sup> /18·10 <sup>-6</sup>        | 0/0                                          | 0/0                       | 0/0                       |
| Grain size<br>exponent(m)                | -                                   | 3/-                                            | 1/-                    | 1/-                    | 3/-                                            | 1/-                                          | 1/-                       | 1/-                       |
| Radioactive<br>heating<br>production (H) | W m <sup>-3</sup>                   | 0                                              | varies                 | varies                 | 0                                              | 0                                            | 0                         | 0                         |
| Viscosity cutoffs <sup>c</sup>           | Pa s                                | 10 <sup>18</sup> – 10 <sup>26</sup>            |                        |                        |                                                |                                              |                           |                           |

11 <sup>a</sup> Flow law are taken from *Hirth and Kohlstedt* [2003] for dry olivine, *Gleason and Tullis* [1995] for wet quartzite, *Rybacki et al.* [2006] for wet anorthite, *Wilks and*

12 *Carter* [1990] for gabbro.

13 <sup>b</sup> The viscosity prefactor,  $A^*$ , is scaled from uniaxial experiments for plane strain as in *Ranalli* [1995] and *Tetreault and Buiter* [2012].

14 <sup>c</sup> User-defined viscosity cutoffs in Eq. (9).

15

Table S2. List of the numerical experiments

| Mode name | $T_{\text{pro\_moho}} (^{\circ}\text{C})$ | $T_{\text{retro\_moho}} (^{\circ}\text{C})$ | $H_{\text{pro-uc}} (\text{W m}^{-3})$ | $H_{\text{retro-uc}} (\text{W m}^{-3})$ | $H_{\text{pro-lc}} (\text{W m}^{-3})$ | $H_{\text{retro-lc}} (\text{W m}^{-3})$ | Collision Patterns |
|-----------|-------------------------------------------|---------------------------------------------|---------------------------------------|-----------------------------------------|---------------------------------------|-----------------------------------------|--------------------|
| m1        | 450                                       | 450                                         | $1.0 \cdot 10^{-6}$                   | $1.0 \cdot 10^{-6}$                     | $4.0 \cdot 10^{-7}$                   | $4.0 \cdot 10^{-7}$                     | I                  |
| m2        | 450                                       | 500                                         | $1.0 \cdot 10^{-6}$                   | $1.0 \cdot 10^{-6}$                     | $4.0 \cdot 10^{-7}$                   | $4.0 \cdot 10^{-7}$                     | I                  |
| m3        | 450                                       | 550                                         | $1.0 \cdot 10^{-6}$                   | $1.0 \cdot 10^{-6}$                     | $4.0 \cdot 10^{-7}$                   | $4.0 \cdot 10^{-7}$                     | I                  |
| m4        | 450                                       | 600                                         | $1.0 \cdot 10^{-6}$                   | $1.0 \cdot 10^{-6}$                     | $4.0 \cdot 10^{-7}$                   | $4.0 \cdot 10^{-7}$                     | I                  |
| m5        | 500                                       | 450                                         | $1.0 \cdot 10^{-6}$                   | $1.0 \cdot 10^{-6}$                     | $4.0 \cdot 10^{-7}$                   | $4.0 \cdot 10^{-7}$                     | II                 |
| m6        | 500                                       | 500                                         | $1.0 \cdot 10^{-6}$                   | $1.0 \cdot 10^{-6}$                     | $4.0 \cdot 10^{-7}$                   | $4.0 \cdot 10^{-7}$                     | I                  |
| m7        | 500                                       | 550                                         | $1.0 \cdot 10^{-6}$                   | $1.0 \cdot 10^{-6}$                     | $4.0 \cdot 10^{-7}$                   | $4.0 \cdot 10^{-7}$                     | I                  |

---

|     |     |     |                     |                     |                     |                     |    |
|-----|-----|-----|---------------------|---------------------|---------------------|---------------------|----|
| m8  | 500 | 600 | $1.0 \cdot 10^{-6}$ | $1.0 \cdot 10^{-6}$ | $4.0 \cdot 10^{-7}$ | $4.0 \cdot 10^{-7}$ | I  |
| m9  | 550 | 450 | $1.0 \cdot 10^{-6}$ | $1.0 \cdot 10^{-6}$ | $4.0 \cdot 10^{-7}$ | $4.0 \cdot 10^{-7}$ | I  |
| m10 | 550 | 500 | $1.0 \cdot 10^{-6}$ | $1.0 \cdot 10^{-6}$ | $4.0 \cdot 10^{-7}$ | $4.0 \cdot 10^{-7}$ | II |
| m11 | 550 | 550 | $1.0 \cdot 10^{-6}$ | $1.0 \cdot 10^{-6}$ | $4.0 \cdot 10^{-7}$ | $4.0 \cdot 10^{-7}$ | I  |
| m12 | 550 | 600 | $1.0 \cdot 10^{-6}$ | $1.0 \cdot 10^{-6}$ | $4.0 \cdot 10^{-7}$ | $4.0 \cdot 10^{-7}$ | I  |
| m13 | 600 | 450 | $1.0 \cdot 10^{-6}$ | $1.0 \cdot 10^{-6}$ | $4.0 \cdot 10^{-7}$ | $4.0 \cdot 10^{-7}$ | I  |
| m14 | 600 | 500 | $1.0 \cdot 10^{-6}$ | $1.0 \cdot 10^{-6}$ | $4.0 \cdot 10^{-7}$ | $4.0 \cdot 10^{-7}$ | II |
| m15 | 600 | 550 | $1.0 \cdot 10^{-6}$ | $1.0 \cdot 10^{-6}$ | $4.0 \cdot 10^{-7}$ | $4.0 \cdot 10^{-7}$ | I  |
| m16 | 600 | 600 | $1.0 \cdot 10^{-6}$ | $1.0 \cdot 10^{-6}$ | $4.0 \cdot 10^{-7}$ | $4.0 \cdot 10^{-7}$ | I  |

---

---

|     |     |     |                     |                     |                     |                     |    |
|-----|-----|-----|---------------------|---------------------|---------------------|---------------------|----|
| m17 | 450 | 500 | $1.5 \cdot 10^{-6}$ | $1.0 \cdot 10^{-6}$ | $4.0 \cdot 10^{-7}$ | $4.0 \cdot 10^{-7}$ | II |
| m18 | 450 | 500 | $2.0 \cdot 10^{-6}$ | $1.0 \cdot 10^{-6}$ | $4.0 \cdot 10^{-7}$ | $4.0 \cdot 10^{-7}$ | II |
| m19 | 450 | 500 | $3.0 \cdot 10^{-6}$ | $1.0 \cdot 10^{-6}$ | $4.0 \cdot 10^{-7}$ | $4.0 \cdot 10^{-7}$ | II |
| m20 | 450 | 500 | $4.0 \cdot 10^{-6}$ | $1.0 \cdot 10^{-6}$ | $4.0 \cdot 10^{-7}$ | $4.0 \cdot 10^{-7}$ | II |
| m21 | 450 | 500 | $1.0 \cdot 10^{-6}$ | $1.5 \cdot 10^{-6}$ | $4.0 \cdot 10^{-7}$ | $4.0 \cdot 10^{-7}$ | II |
| m22 | 450 | 500 | $1.5 \cdot 10^{-6}$ | $1.5 \cdot 10^{-6}$ | $4.0 \cdot 10^{-7}$ | $4.0 \cdot 10^{-7}$ | II |
| m23 | 450 | 500 | $2.0 \cdot 10^{-6}$ | $1.5 \cdot 10^{-6}$ | $4.0 \cdot 10^{-7}$ | $4.0 \cdot 10^{-7}$ | II |
| m24 | 450 | 500 | $3.0 \cdot 10^{-6}$ | $1.5 \cdot 10^{-6}$ | $4.0 \cdot 10^{-7}$ | $4.0 \cdot 10^{-7}$ | II |
| m25 | 450 | 500 | $4.0 \cdot 10^{-6}$ | $1.5 \cdot 10^{-6}$ | $4.0 \cdot 10^{-7}$ | $4.0 \cdot 10^{-7}$ | II |

---

---

|     |     |     |                     |                     |                     |                     |    |
|-----|-----|-----|---------------------|---------------------|---------------------|---------------------|----|
| m26 | 450 | 500 | $1.0 \cdot 10^{-6}$ | $2.0 \cdot 10^{-6}$ | $4.0 \cdot 10^{-7}$ | $4.0 \cdot 10^{-7}$ | I  |
| m27 | 450 | 500 | $1.5 \cdot 10^{-6}$ | $2.0 \cdot 10^{-6}$ | $4.0 \cdot 10^{-7}$ | $4.0 \cdot 10^{-7}$ | II |
| m28 | 450 | 500 | $2.0 \cdot 10^{-6}$ | $2.0 \cdot 10^{-6}$ | $4.0 \cdot 10^{-7}$ | $4.0 \cdot 10^{-7}$ | II |
| m29 | 450 | 500 | $3.0 \cdot 10^{-6}$ | $2.0 \cdot 10^{-6}$ | $4.0 \cdot 10^{-7}$ | $4.0 \cdot 10^{-7}$ | II |
| m30 | 450 | 500 | $4.0 \cdot 10^{-6}$ | $2.0 \cdot 10^{-6}$ | $4.0 \cdot 10^{-7}$ | $4.0 \cdot 10^{-7}$ | II |
| m31 | 450 | 500 | $1.0 \cdot 10^{-6}$ | $3.0 \cdot 10^{-6}$ | $4.0 \cdot 10^{-7}$ | $4.0 \cdot 10^{-7}$ | I  |
| m32 | 450 | 500 | $1.5 \cdot 10^{-6}$ | $3.0 \cdot 10^{-6}$ | $4.0 \cdot 10^{-7}$ | $4.0 \cdot 10^{-7}$ | II |
| m33 | 450 | 500 | $2.0 \cdot 10^{-6}$ | $3.0 \cdot 10^{-6}$ | $4.0 \cdot 10^{-7}$ | $4.0 \cdot 10^{-7}$ | II |
| m34 | 450 | 500 | $3.0 \cdot 10^{-6}$ | $3.0 \cdot 10^{-6}$ | $4.0 \cdot 10^{-7}$ | $4.0 \cdot 10^{-7}$ | II |

---



---

|     |     |     |                     |                     |                     |                     |    |
|-----|-----|-----|---------------------|---------------------|---------------------|---------------------|----|
| m35 | 450 | 500 | $4.0 \cdot 10^{-6}$ | $3.0 \cdot 10^{-6}$ | $4.0 \cdot 10^{-7}$ | $4.0 \cdot 10^{-7}$ | II |
| m36 | 450 | 500 | $1.0 \cdot 10^{-6}$ | $4.0 \cdot 10^{-6}$ | $4.0 \cdot 10^{-7}$ | $4.0 \cdot 10^{-7}$ | II |
| m37 | 450 | 500 | $1.5 \cdot 10^{-6}$ | $4.0 \cdot 10^{-6}$ | $4.0 \cdot 10^{-7}$ | $4.0 \cdot 10^{-7}$ | II |
| m38 | 450 | 500 | $2.0 \cdot 10^{-6}$ | $4.0 \cdot 10^{-6}$ | $4.0 \cdot 10^{-7}$ | $4.0 \cdot 10^{-7}$ | II |
| m39 | 450 | 500 | $3.0 \cdot 10^{-6}$ | $4.0 \cdot 10^{-6}$ | $4.0 \cdot 10^{-7}$ | $4.0 \cdot 10^{-7}$ | II |
| m40 | 450 | 500 | $4.0 \cdot 10^{-6}$ | $4.0 \cdot 10^{-6}$ | $4.0 \cdot 10^{-7}$ | $4.0 \cdot 10^{-7}$ | II |
| m41 | 450 | 500 | $1.0 \cdot 10^{-6}$ | $1.0 \cdot 10^{-6}$ | $2.0 \cdot 10^{-7}$ | $4.0 \cdot 10^{-7}$ | II |
| m42 | 450 | 500 | $1.0 \cdot 10^{-6}$ | $1.0 \cdot 10^{-6}$ | $6.0 \cdot 10^{-7}$ | $4.0 \cdot 10^{-7}$ | II |
| m43 | 450 | 500 | $1.0 \cdot 10^{-6}$ | $1.0 \cdot 10^{-6}$ | $2.0 \cdot 10^{-7}$ | $2.0 \cdot 10^{-7}$ | II |

---

---

|     |     |     |                     |                     |                     |                     |    |
|-----|-----|-----|---------------------|---------------------|---------------------|---------------------|----|
| m44 | 450 | 500 | $1.0 \cdot 10^{-6}$ | $1.0 \cdot 10^{-6}$ | $4.0 \cdot 10^{-7}$ | $2.0 \cdot 10^{-7}$ | II |
| m45 | 450 | 500 | $1.0 \cdot 10^{-6}$ | $1.0 \cdot 10^{-6}$ | $6.0 \cdot 10^{-7}$ | $2.0 \cdot 10^{-7}$ | II |
| m46 | 450 | 500 | $1.0 \cdot 10^{-6}$ | $1.0 \cdot 10^{-6}$ | $2.0 \cdot 10^{-7}$ | $6.0 \cdot 10^{-7}$ | II |
| m47 | 450 | 500 | $1.0 \cdot 10^{-6}$ | $1.0 \cdot 10^{-6}$ | $4.0 \cdot 10^{-7}$ | $6.0 \cdot 10^{-7}$ | II |
| m48 | 450 | 500 | $1.0 \cdot 10^{-6}$ | $1.0 \cdot 10^{-6}$ | $6.0 \cdot 10^{-7}$ | $6.0 \cdot 10^{-7}$ | II |

---

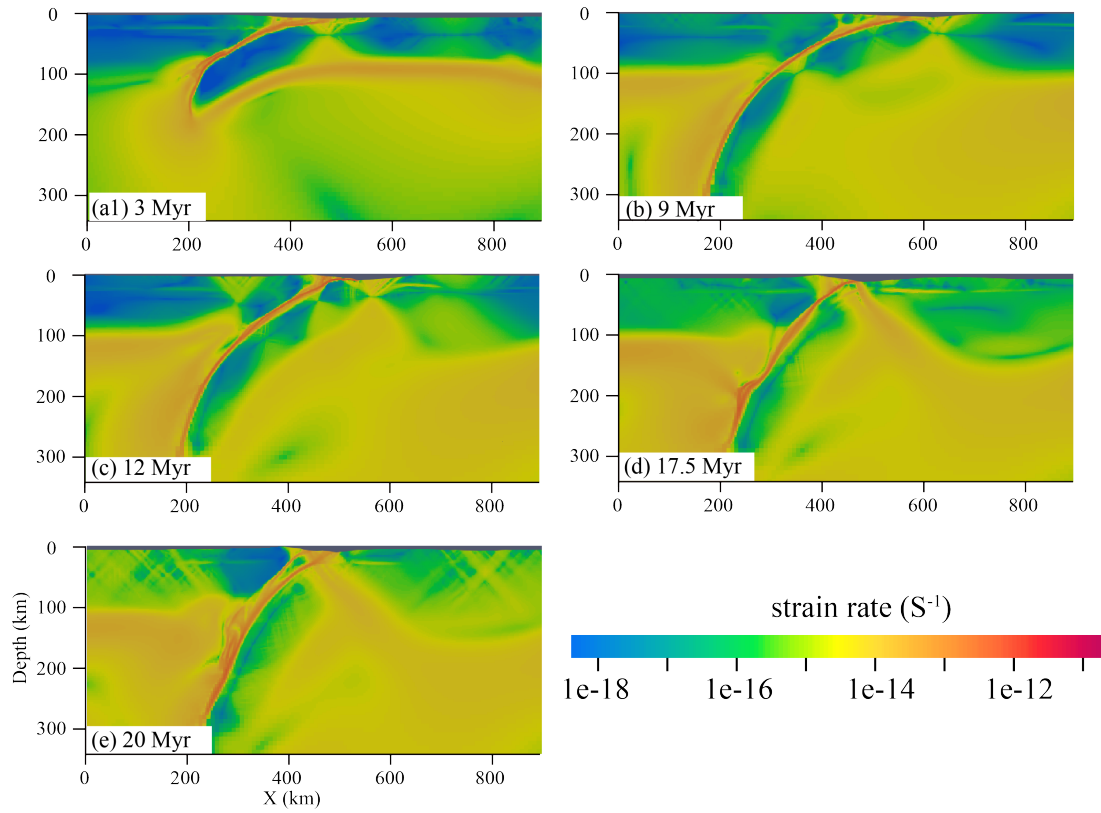

18

19

Figure S1. Strain rate for Model m2 at selected model times.

20

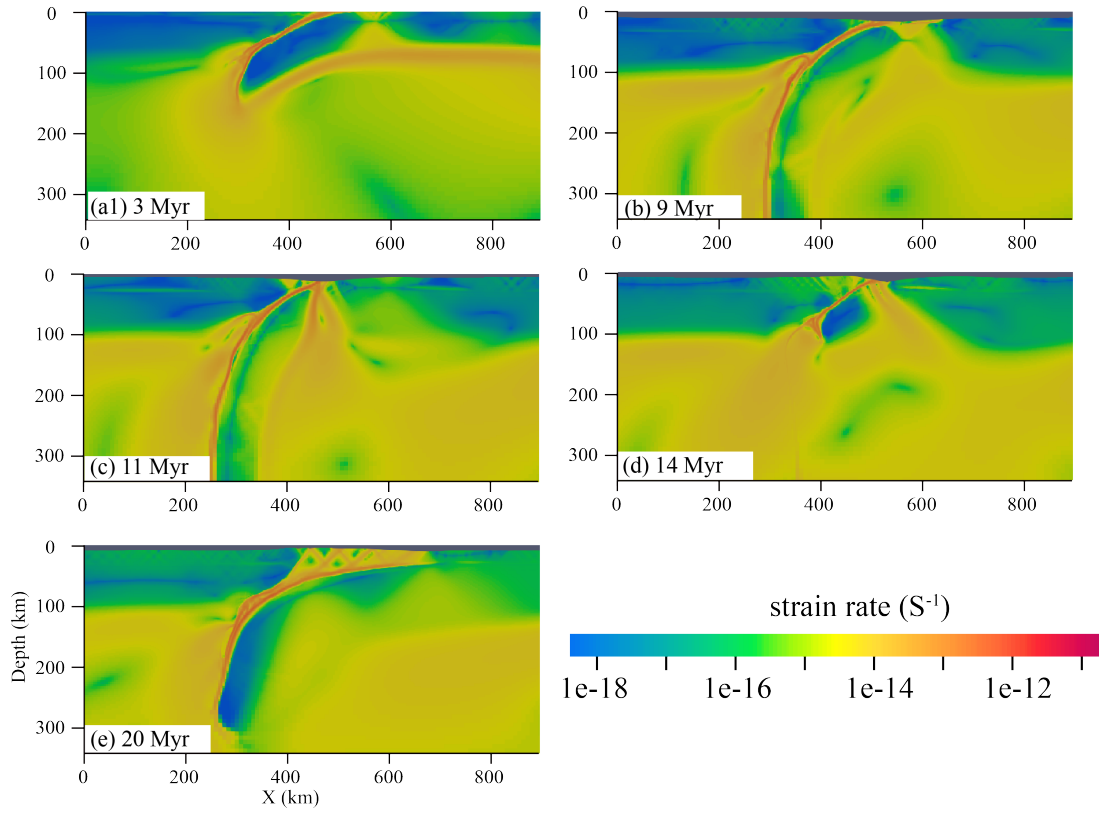

21

22

Figure S2. Strain rate for Model m7 at selected model times.

23
